# Supplementary figures and images for: Ab initio, artificial neural network predictions and experimental synthesis of mischmetal alloying in Sm–Co permanent magnets
Source: Royal Society of Chemistry journal article supplement (doi:10.1039/d2nr00364c), 2022-01-01

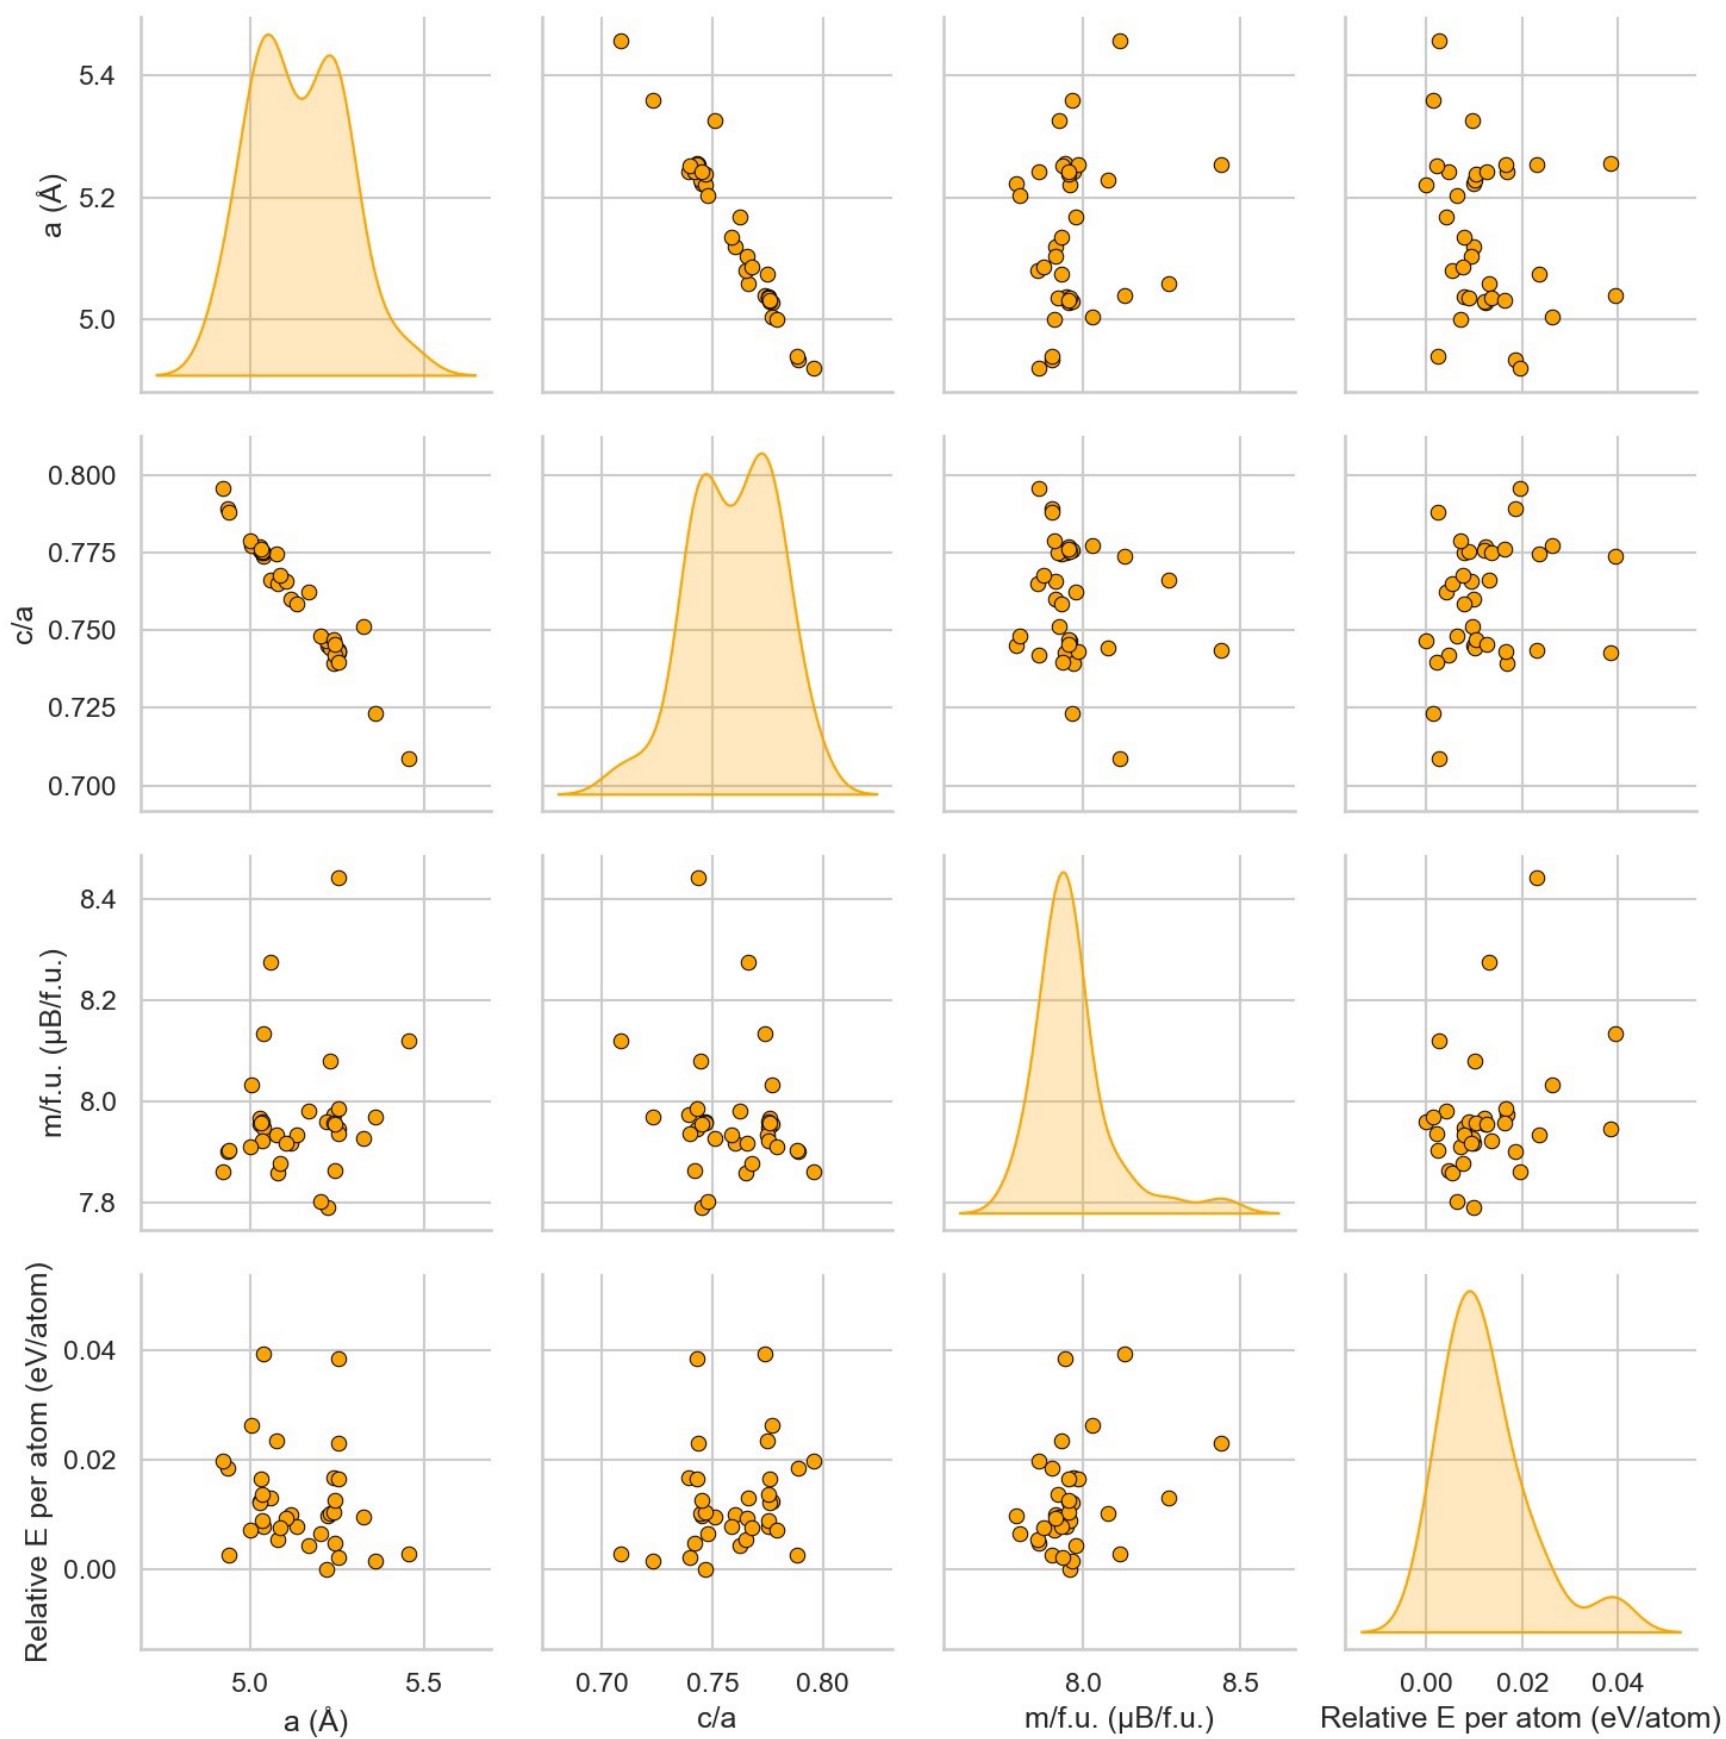

Supplement: d2nr00364c3.pdf [file d2nr00364c3.pdf]

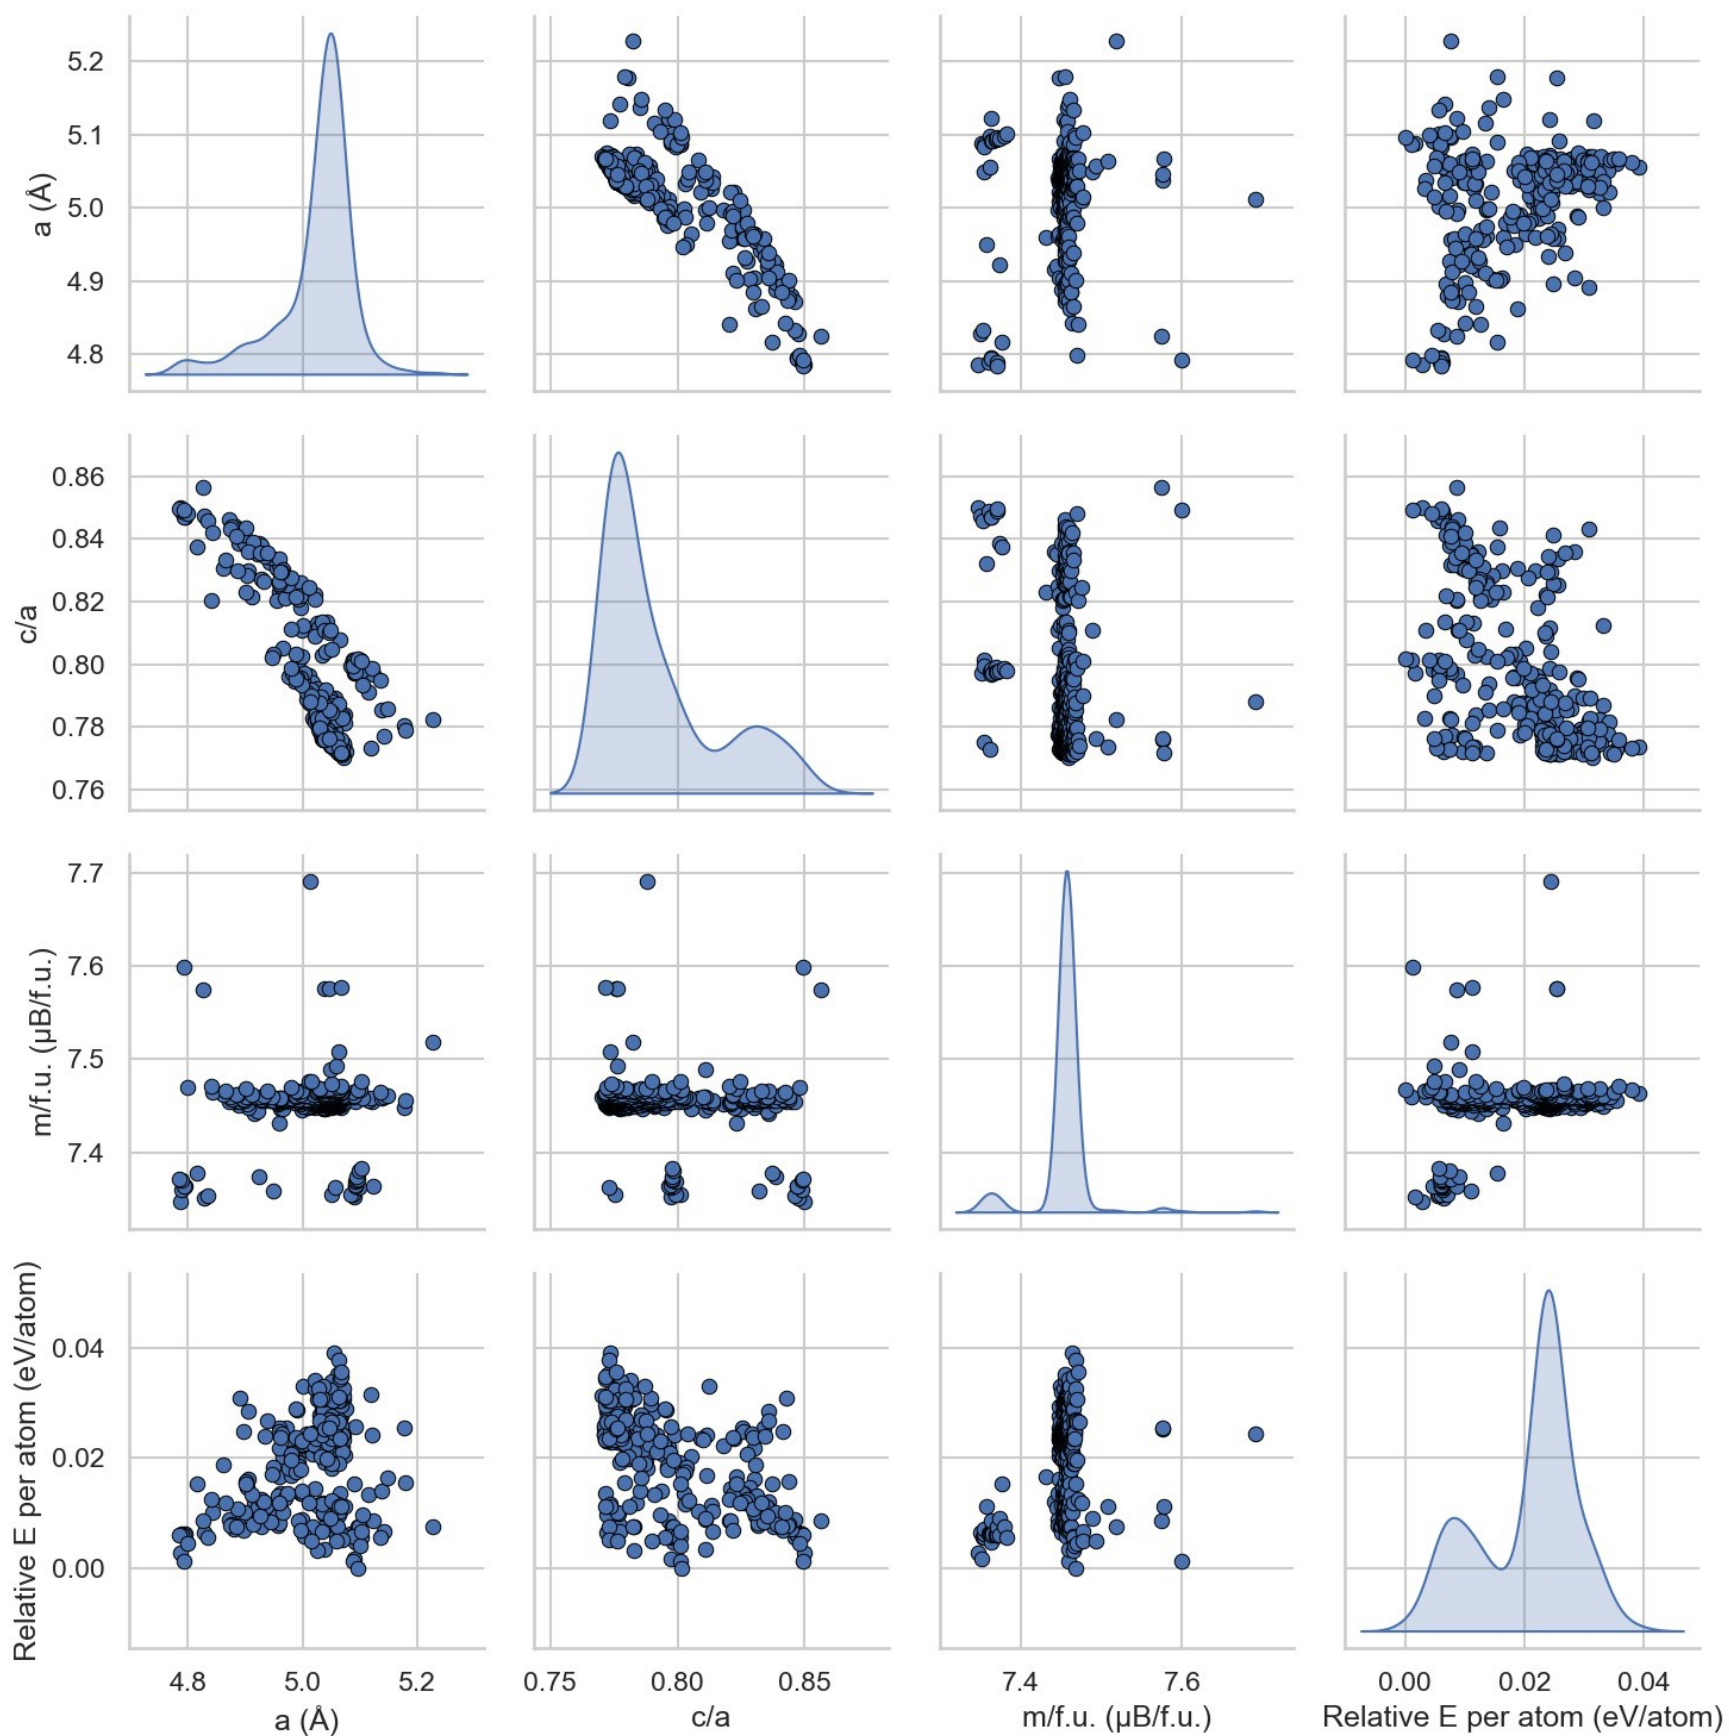

Supplement: d2nr00364c4.pdf [file d2nr00364c4.pdf]

$2 \times 2 \times 2$  dataset

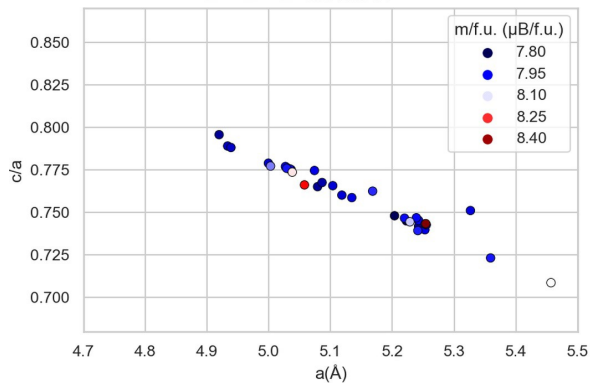

(a)

$2 \times 2 \times 4$  dataset

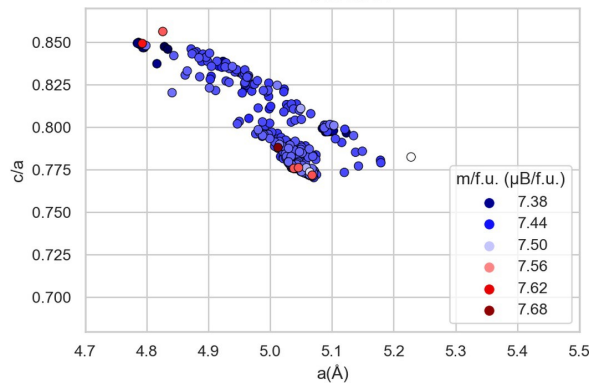

(b)

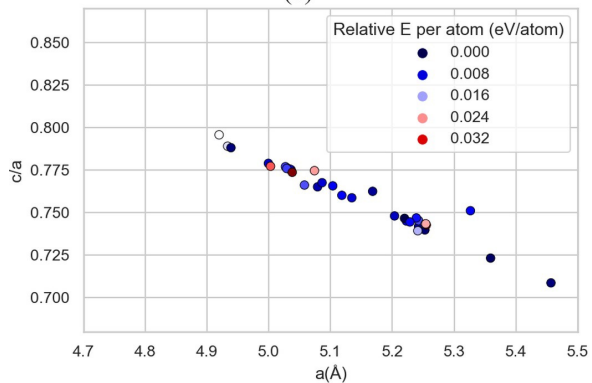

(c)

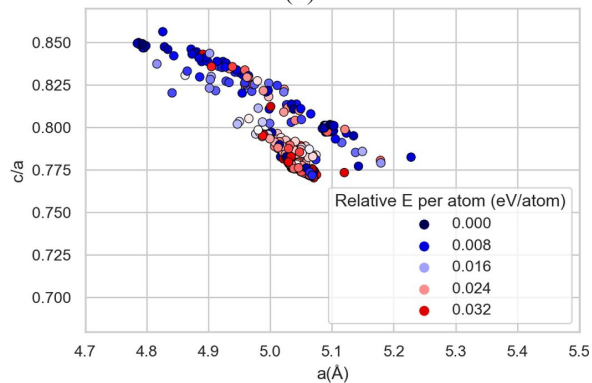

(d)

Supplement: d2nr00364c5.pdf [file d2nr00364c5.pdf]

Units of standard deviation of total magnetization

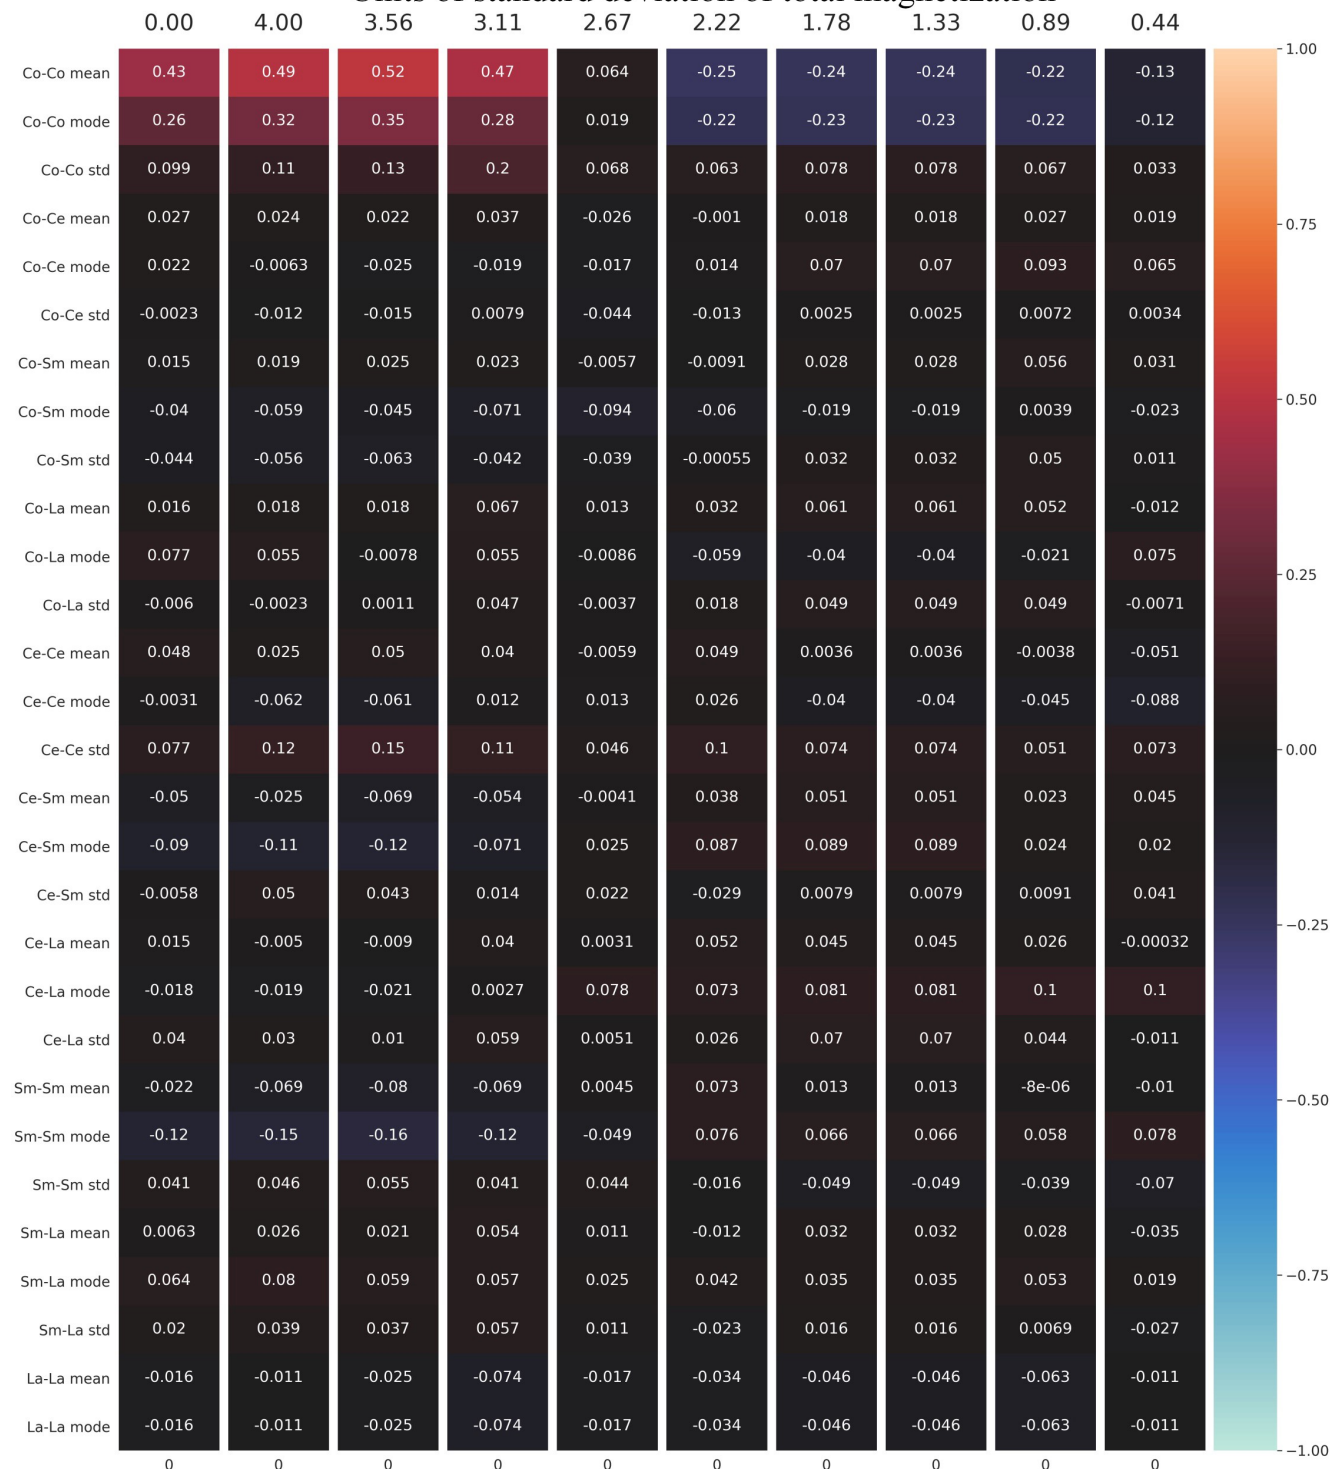

Supplement: d2nr00364c6.pdf [file d2nr00364c6.pdf]

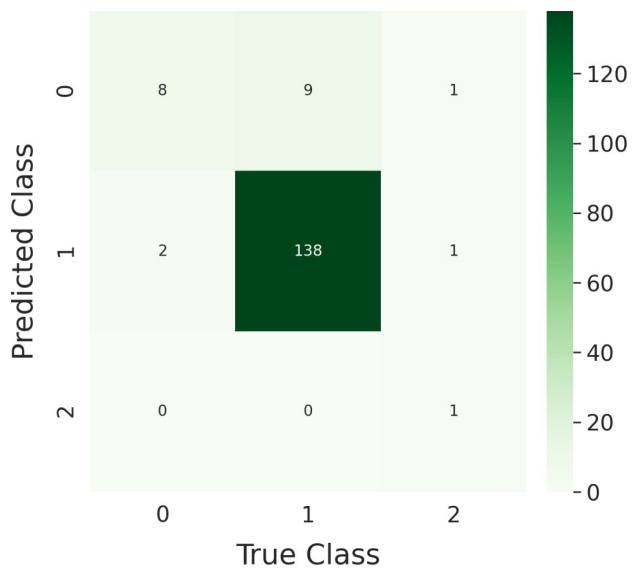

(a)

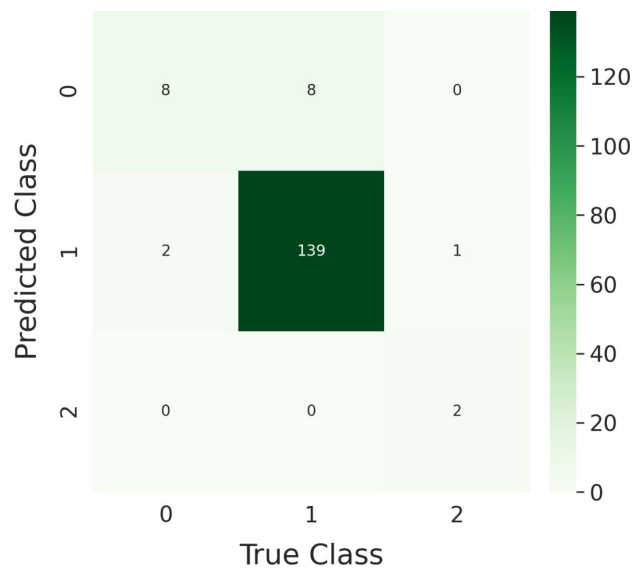

(b)

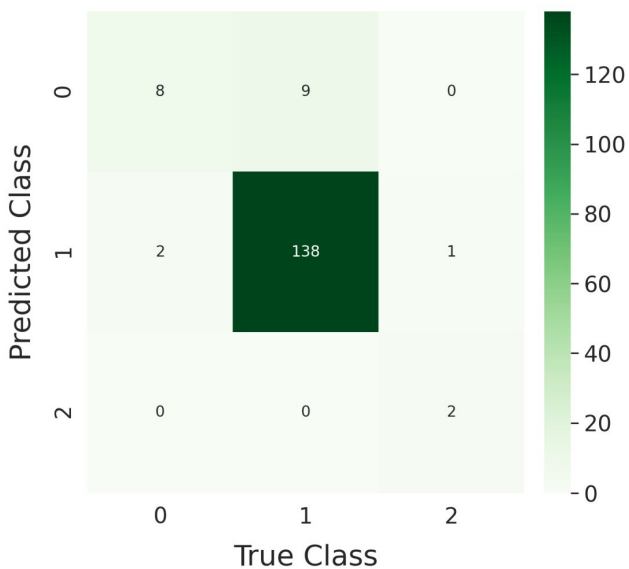

(c)

Supplement: d2nr00364c8.pdf [file d2nr00364c8.pdf]
